# Supplementary material
Source: publisher site journal article supplement (https://www.dovepress.com/article/341824)
Supplement: Supplementary file 1 [file get_supplementary_file.php]

**Supplementary Information**

For “Cyclic RGD-decorated liposomal (-)-gossypol (AT-101) with enhanced targeting effect for tumor therapy”

Hao Liu1

Ruirui Zhang1

Dan Zhang1

Chun Zhang1

Zhuo Zhang1

Xiujuan Fu1

Yu Luo1

Siwei Chen1

Ailing Wu2

Weiling Zeng3

Kunyan Qu1

Hao Zhang1

Sijiao Wang1

Houyin Shi4

1School of Pharmacy, Southwest Medical University, Luzhou City, Sichuan, People's Republic of China; 2Department of Anesthesiology, The First People’s Hospital of Neijiang, Neijiang, Sichuan, the People's Republic of China; 3Department of Scientific Research, the Affiliated Traditional Chinese Medicine Hospital of Southwest Medical University, Luzhou City, Sichuan, People's Republic of China; 4Department of Orthopedics, the Affiliated Traditional Chinese Medicine Hospital of Southwest Medical University, Luzhou City, Sichuan, the People's Republic of China.

**Supplementary Figure**


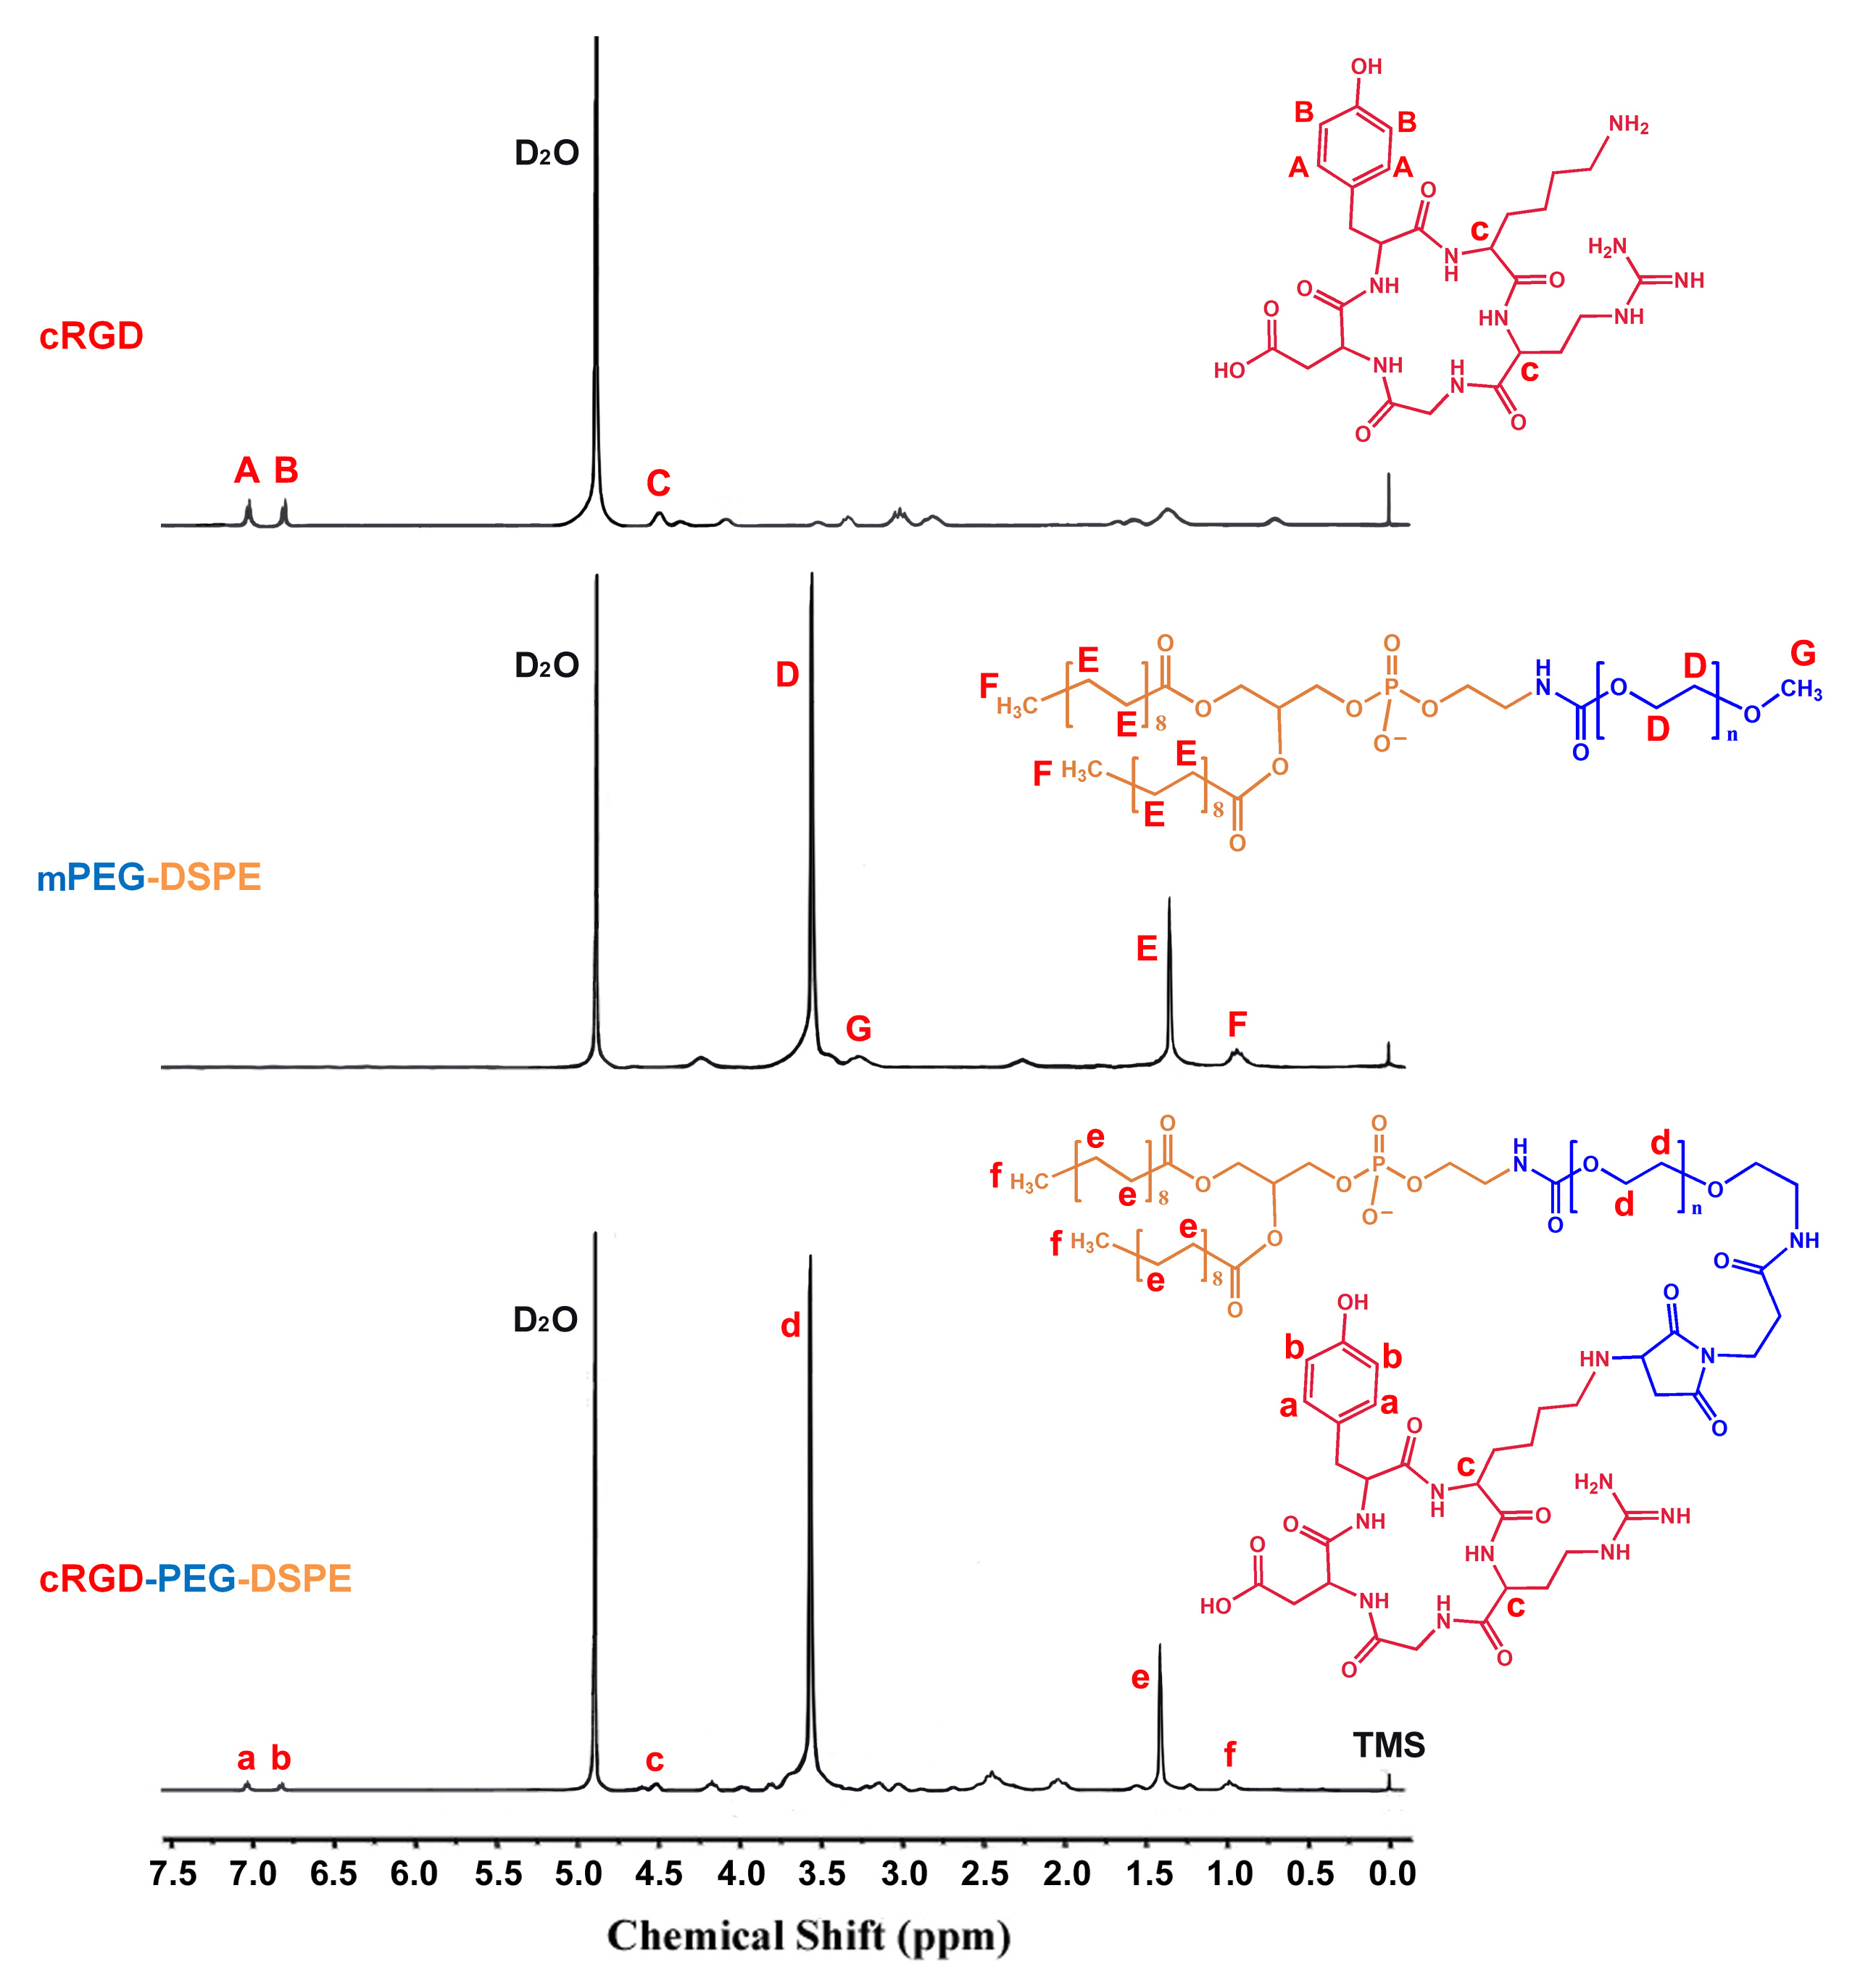


**Figure S1** 1H NMR spectra of cRGD, mPEG-DSPE, and cRGD-PEG-DSPE. Each sample was dissolved in deuterium oxide (D2O) at the concentration of approximately 10 mg mL-1, with tetramethylsilane (TMS) as the internal standard. The 1H NMR spectrum was recorded using an Avance III NMR spectrometer (Bruker Co., Germany) operated at 400 MHz. For cRGD, the NMR peaks assigned to the aromatic ring were observed at 7.03 ppm and 6.81 ppm. For mPEG-DSPE, the NMR peaks at 3.56 ppm and 3.27 ppm were attributable to the mPEG chain; and the NMR peaks at 1.37 ppm and 0.95 ppm were attributable to the stearoyl groups of DSPE. The NMR spectrum of cRGD-PEG-DSPE showed the characteristic peaks of both cRGD and mPEG-DSPE.
